# Supplementary material for: Lifestyle Changes and Determinants of Children’s and Adolescents’ Body Weight Increase during the First COVID-19 Lockdown in Greece: The COV-EAT Study
Source: MDPI journal article supplement (doi:10.3390/nu13030930), 2021-03-13
Supplement: s1 [file s1]

## Questionnaire about the eating habits of children and adolescents during the coronavirus pandemic (Covid-19).

The questionnaire will be open during the period 30/04/2020 - 24/05/2020.

Thank you in advance for your participation!

\* Required

1. Consent form to participate in the study. \*

☐ I declare that I am aware that the data in this questionnaire are confidential and are used anonymously for statistical processing and scientific publication.

☐ I do not wish to participate in this research.

### Section 1: *Demographics.* (In this section the questions concern both parents and children.)

2. Date of Completion of the Questionnaire (day / month / year] \*

---

3. Who completes the questionnaire? \*

☐ Father

☐ Mother

☐ Other

4. Permanent Residence (Note City / Village) \*

---

5. Prefecture of Permanent Residence \*

---

|                                                            | Father                   | Mother                   |
|------------------------------------------------------------|--------------------------|--------------------------|
| Primary School                                             | <input type="checkbox"/> | <input type="checkbox"/> |
| Junior High School                                         | <input type="checkbox"/> | <input type="checkbox"/> |
| High School                                                | <input type="checkbox"/> | <input type="checkbox"/> |
| Post High School Education (Vocational Training Institute) | <input type="checkbox"/> | <input type="checkbox"/> |
| Higher Education                                           | <input type="checkbox"/> | <input type="checkbox"/> |
| Post Graduate Studies (MSc/PHD)                            | <input type="checkbox"/> | <input type="checkbox"/> |

6. Education Level\*

7. Occupational Status (Before Confinement) \*

|            | Father                   | Mother                   |
|------------|--------------------------|--------------------------|
| Working    | <input type="checkbox"/> | <input type="checkbox"/> |
| Unemployed | <input type="checkbox"/> | <input type="checkbox"/> |
| Retired    | <input type="checkbox"/> | <input type="checkbox"/> |

8. If there was a change in the father's employment status during the incarceration, please indicate what kind of change was made: \*

|                          |                                                              |
|--------------------------|--------------------------------------------------------------|
| <input type="checkbox"/> | No change                                                    |
| <input type="checkbox"/> | I worked regular hours, as before the closure, but from home |
| <input type="checkbox"/> | My working hours have been increased                         |
| <input type="checkbox"/> | My working hours have been reduced                           |
| <input type="checkbox"/> | I got a special purpose leave                                |

|                          |                     |
|--------------------------|---------------------|
| <input type="checkbox"/> | I became unemployed |
| <input type="checkbox"/> | Other:.....         |

9. If there was a change in the mother's occupational status during the confinement, please indicate what kind of change was made: \*

|                          |                                                              |
|--------------------------|--------------------------------------------------------------|
| <input type="checkbox"/> | No change                                                    |
| <input type="checkbox"/> | I worked regular hours, as before the closure, but from home |
| <input type="checkbox"/> | My working hours have been increased                         |
| <input type="checkbox"/> | My working hours have been reduced                           |
| <input type="checkbox"/> | I got a special purpose leave                                |
| <input type="checkbox"/> | I became unemployed                                          |
| <input type="checkbox"/> | Other:.....                                                  |

10. Marital Status\*

|                          |               |
|--------------------------|---------------|
| <input type="checkbox"/> | Married       |
| <input type="checkbox"/> | Divorced      |
| <input type="checkbox"/> | Widower/widow |
| <input type="checkbox"/> | Single        |
| <input type="checkbox"/> | Other:.....   |

11. Father's age\*

---

12. Mother's age\*

---

13. How many children do you have (note the number)? \*

---

**Important Note: PLEASE NOTE THAT YOUR ANSWERS CONCERN ONLY ONE CHILD AGED 2-18**

14. Indicate if your child remained at home before confinement. \* (For example if it is too young and you did not send it to school.)

☐ Yes, my child was staying at home before the confinement

☐ No, my child went to school.

15. Child's date of birth (day /month /year) \*

---

16. Child's sex \*

☐ Boy

Girl ☐

**Section 2: Questions concerning parents/guardians.**

| 17. How often do you cook? * | Before Confinement   | After Confinement    |
|------------------------------|----------------------|----------------------|
| Daily                        | <input type="text"/> | <input type="text"/> |

|                     |                          |                          |
|---------------------|--------------------------|--------------------------|
| 5-6 times per week  | <input type="checkbox"/> | <input type="checkbox"/> |
| 3-4 times per week  | <input type="checkbox"/> | <input type="checkbox"/> |
| 1-2 times per week  | <input type="checkbox"/> | <input type="checkbox"/> |
| 1-3 times per month | <input type="checkbox"/> | <input type="checkbox"/> |
| Not at all/Never    | <input type="checkbox"/> | <input type="checkbox"/> |

| 18. Who usually cooks at home? <sup>*</sup> (You can choose more than one answers.) | Before Confinement       | After Confinement        |
|-------------------------------------------------------------------------------------|--------------------------|--------------------------|
| Mother                                                                              | <input type="checkbox"/> | <input type="checkbox"/> |
| Father                                                                              | <input type="checkbox"/> | <input type="checkbox"/> |
| Grandparents                                                                        | <input type="checkbox"/> | <input type="checkbox"/> |
| Relative                                                                            | <input type="checkbox"/> | <input type="checkbox"/> |
| Friends                                                                             | <input type="checkbox"/> | <input type="checkbox"/> |
| Housekeeper                                                                         | <input type="checkbox"/> | <input type="checkbox"/> |

19. Which main meals did you eat / consume during the day? <sup>\*</sup>(The main meals of the day are breakfast, lunch and dinner. Select all the valid answers).

|                    | None                     | Breakfast                | Lunch                    | Dinner                   |
|--------------------|--------------------------|--------------------------|--------------------------|--------------------------|
| Before Confinement | <input type="checkbox"/> | <input type="checkbox"/> | <input type="checkbox"/> | <input type="checkbox"/> |
| After Confinement  | <input type="checkbox"/> | <input type="checkbox"/> | <input type="checkbox"/> | <input type="checkbox"/> |

20. How many snacks did you eat / consume per day? \* (By snack we mean the small meals that we usually consume between the main meals, eg in the afternoon, before bed, etc.).

---

21. Have you increased snacking during confinement? \*

|                          |              |
|--------------------------|--------------|
| <input type="checkbox"/> | Not at all   |
| <input type="checkbox"/> | Very little  |
| <input type="checkbox"/> | A little     |
| <input type="checkbox"/> | Considerably |
| <input type="checkbox"/> | Immensely    |

22. Which is/are the main reason/reasons for increasing snacking? \* (You can check more than one answers.)

|                          |                              |
|--------------------------|------------------------------|
| <input type="checkbox"/> | I haven't increased snacking |
| <input type="checkbox"/> | I feel bored                 |
| <input type="checkbox"/> | I'm stressed                 |
| <input type="checkbox"/> | Lack of sleep                |
| <input type="checkbox"/> | Hunger                       |
| <input type="checkbox"/> | To boost my immune system    |
| <input type="checkbox"/> | Other:.....                  |

23. What kind of food do you prefer for snacking? \* (You can choose more than one answers.)

Salty snacks (potato chips, pop corns, crackers etc)

Sweets (chocolate, biscuits, cakes, ice cream etc)

Fruit /vegetables

The COV-EAT study Questionnaire

- ☐ Dairy (milk ,cheese, yoghurt)
- ☐ Nuts
- ☐ Cereals/cereal bars/bread/breadsticks
- ☐ Cold cuts (turkey ,ham, salami etc)
- ☐ Soft drinks

24. ☐ How often do you order fast food?\*

☐

|                     | Before Confinement       | After Confinement        |
|---------------------|--------------------------|--------------------------|
| Daily               | <input type="checkbox"/> | <input type="checkbox"/> |
| 5-6 times per week  | <input type="checkbox"/> | <input type="checkbox"/> |
| 3-4 times per week  | <input type="checkbox"/> | <input type="checkbox"/> |
| 1-2 times per week  | <input type="checkbox"/> | <input type="checkbox"/> |
| 1-3 times per month | <input type="checkbox"/> | <input type="checkbox"/> |
| Not at all/Never    | <input type="checkbox"/> | <input type="checkbox"/> |

25. Are you interested in healthy eating?\*

Yes ☐

No ☐

26. If yes, which is the main source of your information?

|                          |                        |
|--------------------------|------------------------|
| <input type="checkbox"/> | Internet               |
| <input type="checkbox"/> | Newspapers/Magazines   |
| <input type="checkbox"/> | TV                     |
| <input type="checkbox"/> | Dietitian/Nutritionist |

☐

Other:.....

27. Are you trying to lose weight this period? \*

Yes ☐

No ☐

28. Are you following a diet plan?\*

Yes ☐

No ☐

29. If yes, when did you begin?

Before ☐ confinement

☐ During confinement

30.If you are following a diet plan where did you get it from?

Dietitian/Nutritionist

Doctor

Trainer



- ☐ Friend
- ☐ Internet
- ☐
- ☐ Newspaper/magazine
- ☐ Other:.....
- ☐
- ☐

31. Please note the father's weight (Weight in kg)

---

32. Please note the father's height (Height in cm)

---

33. Please note the mother's weight (Weight in kg)

---

34. Please note the mother's height.(Height in cm)

---

**IMPORTANT NOTE: Your answers are concerning only one of your children aged 2-18**

35. Please note your child's weight \* (Weight in kg)

---

36. Please note your child's height. \* (Height in cm)

---

37. Has your child's weight changed during the confinement\*

☐

It didn't change

|                          |              |
|--------------------------|--------------|
| <input type="checkbox"/> | It increased |
| <input type="checkbox"/> | It decreased |
| <input type="checkbox"/> | I don't know |

38. If your child's weight was increased please note the number of kilos increased

---

39. Which main meals does your child consume? \* (The main meals of the day are breakfast, lunch and dinner. You can write down more than one answer)

|                    | None                     | Breakfast                | Lunch                    | Dinner                   |
|--------------------|--------------------------|--------------------------|--------------------------|--------------------------|
| Before Confinement | <input type="checkbox"/> | <input type="checkbox"/> | <input type="checkbox"/> | <input type="checkbox"/> |
| After Confinement  | <input type="checkbox"/> | <input type="checkbox"/> | <input type="checkbox"/> | <input type="checkbox"/> |

40. How often does your child consume breakfast? \*

|                     | Before Confinement       | After Confinement        |
|---------------------|--------------------------|--------------------------|
| Daily               | <input type="checkbox"/> | <input type="checkbox"/> |
| 5-6 times per week  | <input type="checkbox"/> | <input type="checkbox"/> |
| 3-4 times per week  | <input type="checkbox"/> | <input type="checkbox"/> |
| 1-2 times per week  | <input type="checkbox"/> | <input type="checkbox"/> |
| 1-3 times per month | <input type="checkbox"/> | <input type="checkbox"/> |
| Not at all/Never    | <input type="checkbox"/> | <input type="checkbox"/> |

41. How many snacks does your child eat / consume per day? \* (By snack we mean the snacks that we usually consume between the main meals, eg tithe, afternoon, bedtime, etc.)

|                    | None                     | 1                        | 2                        | 3                        | ≥4                       |
|--------------------|--------------------------|--------------------------|--------------------------|--------------------------|--------------------------|
| Before Confinement | <input type="checkbox"/> | <input type="checkbox"/> | <input type="checkbox"/> | <input type="checkbox"/> | <input type="checkbox"/> |

|                   | None                 | 1                    | 2                    | 3                    | ≥4                   |
|-------------------|----------------------|----------------------|----------------------|----------------------|----------------------|
| After Confinement | <input type="text"/> | <input type="text"/> | <input type="text"/> | <input type="text"/> | <input type="text"/> |

42. How often does your child eat fast food? \* (By fast food we mean for example pizza, skewers, burgers, sandwiches etc.)

|                     | Before Confinement   | After Confinement    |
|---------------------|----------------------|----------------------|
| Daily               | <input type="text"/> | <input type="text"/> |
| 5-6 times per week  | <input type="text"/> | <input type="text"/> |
| 3-4 times per week  | <input type="text"/> | <input type="text"/> |
| 1-2 times per week  | <input type="text"/> | <input type="text"/> |
| 1-3 times per month | <input type="text"/> | <input type="text"/> |
| Not at all/Never    | <input type="text"/> | <input type="text"/> |

43. How often does your child eat fruits?

|                     | Before Confinement   | After Confinement    |
|---------------------|----------------------|----------------------|
| Daily               | <input type="text"/> | <input type="text"/> |
| 5-6 times per week  | <input type="text"/> | <input type="text"/> |
| 3-4 times per week  | <input type="text"/> | <input type="text"/> |
| 1-2 times per week  | <input type="text"/> | <input type="text"/> |
| 1-3 times per month | <input type="text"/> | <input type="text"/> |
| Not at all/Never    | <input type="text"/> | <input type="text"/> |

44. How many fruits per day, does your child consume? \*

|                    | None                 | 1                    | 2                    | 3                    | 4                    | >4                   |
|--------------------|----------------------|----------------------|----------------------|----------------------|----------------------|----------------------|
| Before Confinement | <input type="text"/> | <input type="text"/> | <input type="text"/> | <input type="text"/> | <input type="text"/> | <input type="text"/> |
| After Confinement  | <input type="text"/> | <input type="text"/> | <input type="text"/> | <input type="text"/> | <input type="text"/> | <input type="text"/> |

45. How often does your child consume pre-packed fruit juices? \* (When we say packaged juices we mean commercial juices with or without sugar.)

|                     | Before Confinement   | After Confinement    |
|---------------------|----------------------|----------------------|
| Daily               | <input type="text"/> | <input type="text"/> |
| 5-6 times per week  | <input type="text"/> | <input type="text"/> |
| 3-4 times per week  | <input type="text"/> | <input type="text"/> |
| 1-2 times per week  | <input type="text"/> | <input type="text"/> |
| 1-3 times per month | <input type="text"/> | <input type="text"/> |
| Not at all/Never    | <input type="text"/> | <input type="text"/> |

46. How many glasses of pre-packed fruit juice does your child consume on a daily basis? \* (One glass equals 250ml.)

|                    | None                 | 1                    | 2                    | 3                    | >3                   |
|--------------------|----------------------|----------------------|----------------------|----------------------|----------------------|
| Before Confinement | <input type="text"/> | <input type="text"/> | <input type="text"/> | <input type="text"/> | <input type="text"/> |
| After Confinement  | <input type="text"/> | <input type="text"/> | <input type="text"/> | <input type="text"/> | <input type="text"/> |

47. How often does your child consume fresh fruit juices? \* (from fresh fruit with or without fiber, without added sugar.)

|                    | Before Confinement   | After Confinement    |
|--------------------|----------------------|----------------------|
| Daily              | <input type="text"/> | <input type="text"/> |
| 5-6 times per week | <input type="text"/> | <input type="text"/> |
| 3-4 times per week | <input type="text"/> | <input type="text"/> |

|                     |                      |                      |
|---------------------|----------------------|----------------------|
| 1-2 times per week  | <input type="text"/> | <input type="text"/> |
| 1-3 times per month | <input type="text"/> | <input type="text"/> |
| Not at all/Never    | <input type="text"/> | <input type="text"/> |

48. How many glasses of freshly squeezed fruit juice per day does your child consume? \* (1 glass equals 250 ml.)

|                    | None                 | 1                    | 2                    | 3                    | >3                   |
|--------------------|----------------------|----------------------|----------------------|----------------------|----------------------|
| Before Confinement | <input type="text"/> | <input type="text"/> | <input type="text"/> | <input type="text"/> | <input type="text"/> |
| After Confinement  | <input type="text"/> | <input type="text"/> | <input type="text"/> | <input type="text"/> | <input type="text"/> |

49. How often does your child consume vegetables (cooked or raw)?

|                     | Before Confinement   | After Confinement    |
|---------------------|----------------------|----------------------|
| Daily               | <input type="text"/> | <input type="text"/> |
| 5-6 times per week  | <input type="text"/> | <input type="text"/> |
| 3-4 times per week  | <input type="text"/> | <input type="text"/> |
| 1-2 times per week  | <input type="text"/> | <input type="text"/> |
| 1-3 times per month | <input type="text"/> | <input type="text"/> |
| Not at all/Never    | <input type="text"/> | <input type="text"/> |

50. How many vegetables does your child consume per day? \* (1 portion of vegetables is 1 cup raw vegetables and half a cup of boiled or grilled vegetables.)

|                    | None                 | 1                    | 2                    | 3                    | 4                    | >4                   |
|--------------------|----------------------|----------------------|----------------------|----------------------|----------------------|----------------------|
| Before Confinement | <input type="text"/> | <input type="text"/> | <input type="text"/> | <input type="text"/> | <input type="text"/> | <input type="text"/> |
| After Confinement  | <input type="text"/> | <input type="text"/> | <input type="text"/> | <input type="text"/> | <input type="text"/> | <input type="text"/> |

51. How often does your child consume dairy products? \* (With the term dairy we mean milk ,yoghurt ,cheese)

|                     | Before Confinement   | After Confinement    |
|---------------------|----------------------|----------------------|
| Daily               | <input type="text"/> | <input type="text"/> |
| 5-6 times per week  | <input type="text"/> | <input type="text"/> |
| 3-4 times per week  | <input type="text"/> | <input type="text"/> |
| 1-2 times per week  | <input type="text"/> | <input type="text"/> |
| 1-3 times per month | <input type="text"/> | <input type="text"/> |
| Not at all/Never    | <input type="text"/> | <input type="text"/> |

52. How many portions of dairy products does your child consume per day? \* {1 portion of dairy is 1 cup of milk (240 ml) or 1 cup of yogurt (150 g) or 1 matchbox of cheese (30 g)}

|                    | None                 | 1                    | 2                    | 3                    | 4                    | >4                   |
|--------------------|----------------------|----------------------|----------------------|----------------------|----------------------|----------------------|
| Before Confinement | <input type="text"/> | <input type="text"/> | <input type="text"/> | <input type="text"/> | <input type="text"/> | <input type="text"/> |
| After Confinement  | <input type="text"/> | <input type="text"/> | <input type="text"/> | <input type="text"/> | <input type="text"/> | <input type="text"/> |

53. How often does your child consume red meat? \* (By red meat we mean beef, lamb, goat, pork etc.)

|                     | Before Confinement   | After Confinement    |
|---------------------|----------------------|----------------------|
| Daily               | <input type="text"/> | <input type="text"/> |
| 5-6 times per week  | <input type="text"/> | <input type="text"/> |
| 3-4 times per week  | <input type="text"/> | <input type="text"/> |
| 1-2 times per week  | <input type="text"/> | <input type="text"/> |
| 1-3 times per month | <input type="text"/> | <input type="text"/> |
| Not at all/Never    | <input type="text"/> | <input type="text"/> |

54. How often does your child consume poultry? <sup>\*</sup> (By poultry we mean chicken, turkey, rabbit etc.)

|                     | Before Confinement       | After Confinement        |
|---------------------|--------------------------|--------------------------|
| Daily               | <input type="checkbox"/> | <input type="checkbox"/> |
| 5-6 times per week  | <input type="checkbox"/> | <input type="checkbox"/> |
| 3-4 times per week  | <input type="checkbox"/> | <input type="checkbox"/> |
| 1-2 times per week  | <input type="checkbox"/> | <input type="checkbox"/> |
| 1-3 times per month | <input type="checkbox"/> | <input type="checkbox"/> |
| Not at all/Never    | <input type="checkbox"/> | <input type="checkbox"/> |

55. How often does your child consume fish? <sup>\*</sup>

|                     | Before Confinement       | After Confinement        |
|---------------------|--------------------------|--------------------------|
| Daily               | <input type="checkbox"/> | <input type="checkbox"/> |
| 5-6 times per week  | <input type="checkbox"/> | <input type="checkbox"/> |
| 3-4 times per week  | <input type="checkbox"/> | <input type="checkbox"/> |
| 1-2 times per week  | <input type="checkbox"/> | <input type="checkbox"/> |
| 1-3 times per month | <input type="checkbox"/> | <input type="checkbox"/> |
| Not at all/Never    | <input type="checkbox"/> | <input type="checkbox"/> |

56. How often does your child consume pasta, potatoes, rice?

|                     | Before Confinement       | After Confinement        |
|---------------------|--------------------------|--------------------------|
| Daily               | <input type="checkbox"/> | <input type="checkbox"/> |
| 5-6 times per week  | <input type="checkbox"/> | <input type="checkbox"/> |
| 3-4 times per week  | <input type="checkbox"/> | <input type="checkbox"/> |
| 1-2 times per week  | <input type="checkbox"/> | <input type="checkbox"/> |
| 1-3 times per month | <input type="checkbox"/> | <input type="checkbox"/> |
| Not at all/Never    | <input type="checkbox"/> | <input type="checkbox"/> |

57. How often does your child consume legumes? \* (By legumes we mean beans, chickpeas, lentils, fava beans, broad beans etc.)

|                     | Before Confinement   | After Confinement    |
|---------------------|----------------------|----------------------|
| Daily               | <input type="text"/> | <input type="text"/> |
| 5-6 times per week  | <input type="text"/> | <input type="text"/> |
| 3-4 times per week  | <input type="text"/> | <input type="text"/> |
| 1-2 times per week  | <input type="text"/> | <input type="text"/> |
| 1-3 times per month | <input type="text"/> | <input type="text"/> |
| Not at all/Never    | <input type="text"/> | <input type="text"/> |

58. How often does your child consume homemade sweets? \* (By homemade sweets we mean sweets that are made at home eg. cakes, biscuits, rice pudding, creams etc.)

|                     | Before Confinement   | After Confinement    |
|---------------------|----------------------|----------------------|
| Daily               | <input type="text"/> | <input type="text"/> |
| 5-6 times per week  | <input type="text"/> | <input type="text"/> |
| 3-4 times per week  | <input type="text"/> | <input type="text"/> |
| 1-2 times per week  | <input type="text"/> | <input type="text"/> |
| 1-3 times per month | <input type="text"/> | <input type="text"/> |
| Not at all/Never    | <input type="text"/> | <input type="text"/> |

59. How often does your child consume commercially available sweets? \* (By commercially available sweets we mean sweets that can be found at supermarkets, confectioneries, bakeries, etc. eg. desserts with sugar, chocolate, milk-based desserts, cakes, croissants, cookies, pastries, ice creams etc.)

|                     | Before Confinement   | After Confinement    |
|---------------------|----------------------|----------------------|
| Daily               | <input type="text"/> | <input type="text"/> |
| 5-6 times per week  | <input type="text"/> | <input type="text"/> |
| 3-4 times per week  | <input type="text"/> | <input type="text"/> |
| 1-2 times per week  | <input type="text"/> | <input type="text"/> |
| 1-3 times per month | <input type="text"/> | <input type="text"/> |



|                  |                          |                          |
|------------------|--------------------------|--------------------------|
| Not at all/Never | <input type="checkbox"/> | <input type="checkbox"/> |
|------------------|--------------------------|--------------------------|

60. How often does your child consume salty snacks? \* (By salty snacks we mean chips, savory cookies / crackers, pies such as cheese pies, ham and cheese pies, spinach pies etc.)

|                     | Before Confinement       | After Confinement        |
|---------------------|--------------------------|--------------------------|
| Daily               | <input type="checkbox"/> | <input type="checkbox"/> |
| 5-6 times per week  | <input type="checkbox"/> | <input type="checkbox"/> |
| 3-4 times per week  | <input type="checkbox"/> | <input type="checkbox"/> |
| 1-2 times per week  | <input type="checkbox"/> | <input type="checkbox"/> |
| 1-3 times per month | <input type="checkbox"/> | <input type="checkbox"/> |
| Not at all/Never    | <input type="checkbox"/> | <input type="checkbox"/> |

61. How often does your child consume soft drinks? \* (We mean packaged soft drinks / energy drinks with added sugar.)

|                     | Before Confinement       | After Confinement        |
|---------------------|--------------------------|--------------------------|
| Daily               | <input type="checkbox"/> | <input type="checkbox"/> |
| 5-6 times per week  | <input type="checkbox"/> | <input type="checkbox"/> |
| 3-4 times per week  | <input type="checkbox"/> | <input type="checkbox"/> |
| 1-2 times per week  | <input type="checkbox"/> | <input type="checkbox"/> |
| 1-3 times per month | <input type="checkbox"/> | <input type="checkbox"/> |
| Not at all/Never    | <input type="checkbox"/> | <input type="checkbox"/> |

62. Is your child taking any vitamin / mineral supplements? \* (You can choose more than one answers)

|                     | Before Confinement       | After Confinement        |
|---------------------|--------------------------|--------------------------|
| No supplements      | <input type="checkbox"/> | <input type="checkbox"/> |
| Yes, a multivitamin | <input type="checkbox"/> | <input type="checkbox"/> |

|                    |                          |                          |
|--------------------|--------------------------|--------------------------|
| Yes, vitamin D     | <input type="checkbox"/> | <input type="checkbox"/> |
| Yes, vitamin C     | <input type="checkbox"/> | <input type="checkbox"/> |
| Yes, fatty acids   | <input type="checkbox"/> | <input type="checkbox"/> |
| Another supplement | <input type="checkbox"/> | <input type="checkbox"/> |

63. If your child was receiving vitamin D, determine in what form?

- ☐ Drops
- ☐ Spray
- ☐ Tablet
- ☐ Capsule

Other:.....

64. Approximately how much time (in hours) per day does your child spend on screen activities? \* (By screen activities we mean the hours out of school on TV, DVD, PC, tablet, smartphone, video games.)

|                                                  | Before Confinement       | After Confinement        |
|--------------------------------------------------|--------------------------|--------------------------|
| Not at all                                       | <input type="checkbox"/> | <input type="checkbox"/> |
| Less than one hour                               | <input type="checkbox"/> | <input type="checkbox"/> |
| More or equal with 1 hour and less than 2 hours  | <input type="checkbox"/> | <input type="checkbox"/> |
| More or equal with 2 hours and less than 3 hours | <input type="checkbox"/> | <input type="checkbox"/> |
| More than 3 hours                                | <input type="checkbox"/> | <input type="checkbox"/> |

| Before Confinement | After Confinement |
|--------------------|-------------------|
|--------------------|-------------------|

|            |                      |                      |
|------------|----------------------|----------------------|
| < 8 hours  | <input type="text"/> | <input type="text"/> |
| 8-10 hours | <input type="text"/> | <input type="text"/> |
| >10 hours  | <input type="text"/> | <input type="text"/> |

65. How many hours does your child sleep at night? \*

|              | Before Confinement   | After Confinement    |
|--------------|----------------------|----------------------|
| < 8 hours    | <input type="text"/> | <input type="text"/> |
| 8 – 10 hours | <input type="text"/> | <input type="text"/> |
| > 10 hours   | <input type="text"/> | <input type="text"/> |

66. Did your child's physical activity change during the confinement compared to before the confinement? \* (By physical activity we mean participation in activities such as walking, running, cycling, exercise, etc.)

- ☐ It didn't change  
☐ It increased  
 It ☐ decreased  
 I ☐ don't know /I don't answer

67. Did/Does your child follow a specific diet plan by a specialist? \*

|     | Before Confinement   | After Confinement    |
|-----|----------------------|----------------------|
| YES | <input type="text"/> | <input type="text"/> |
| NO  | <input type="text"/> | <input type="text"/> |

68. During the confinement, was your child diagnosed with any medical condition? \*

- ☐ Yes  
☐ No

69.If yes please note the medical condition.

---

70. Please note your e-mail if you wish

---
